# Supplementary material
Source: PubMed Central journal article supplement (PMC5327922)
Supplement: NIHMS815036-supplement-SI.pdf [file NIHMS815036-supplement-SI.pdf]

## Supporting Information

### New triterpenoidal saponins from *Koelreuteria paniculata*

Ahmad E. Mostafa <sup>1,2</sup>, Atef A. El-Hela <sup>2</sup>, Abd-Elsalam I. Mohammad <sup>2</sup>, Stephen J. Cutler <sup>3</sup> and Samir A. Ross <sup>1,3,\*</sup>

#### Affiliation

<sup>1</sup> National Center for Natural Products Research, The University of Mississippi, University, MS 38677, USA.

<sup>2</sup> Department of Pharmacognosy, Faculty of Pharmacy, University of Al-Azhar, Cairo 11371, Egypt.

<sup>3</sup> Department of BioMolecular Sciences, School of Pharmacy, The University of Mississippi, University, MS 38677, USA.

#### Correspondence

Prof. Dr. Samir A. Ross, National Center for Natural Products Research and Department of BioMolecular Sciences, School of Pharmacy, The University of Mississippi, University MS 38677, USA.

Tel.: +1-662-915-1031; fax: +1-662-915-7989

*E-mail address:* sross@olemiss.edu (S.A. Ross)

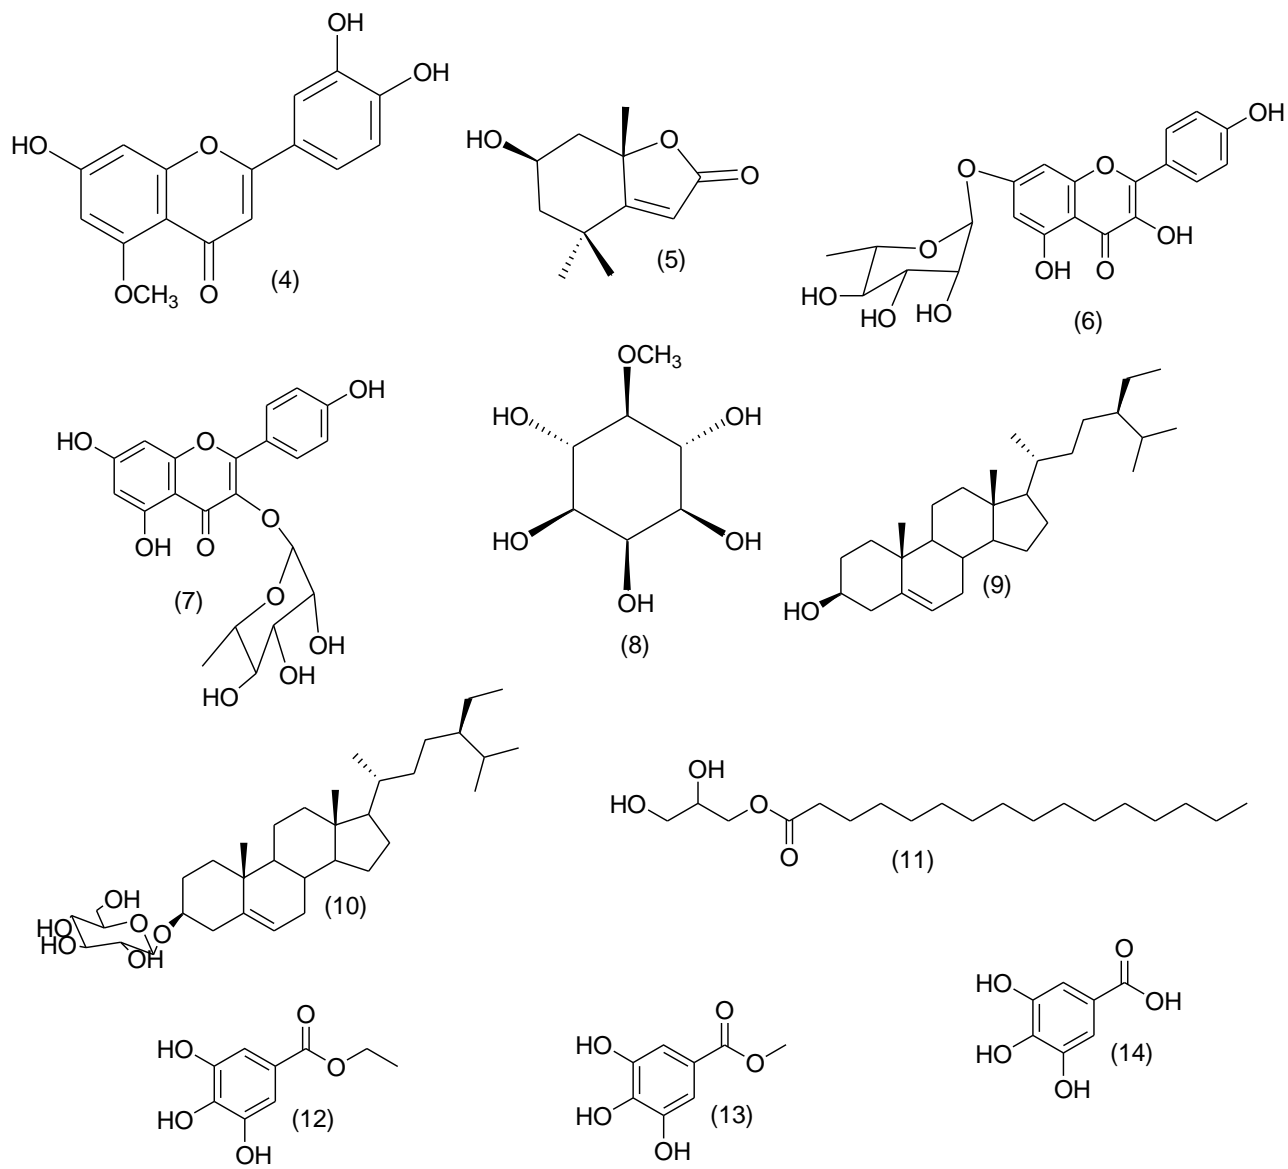

Figure 1: Chemical Structure of Compounds 4-14.

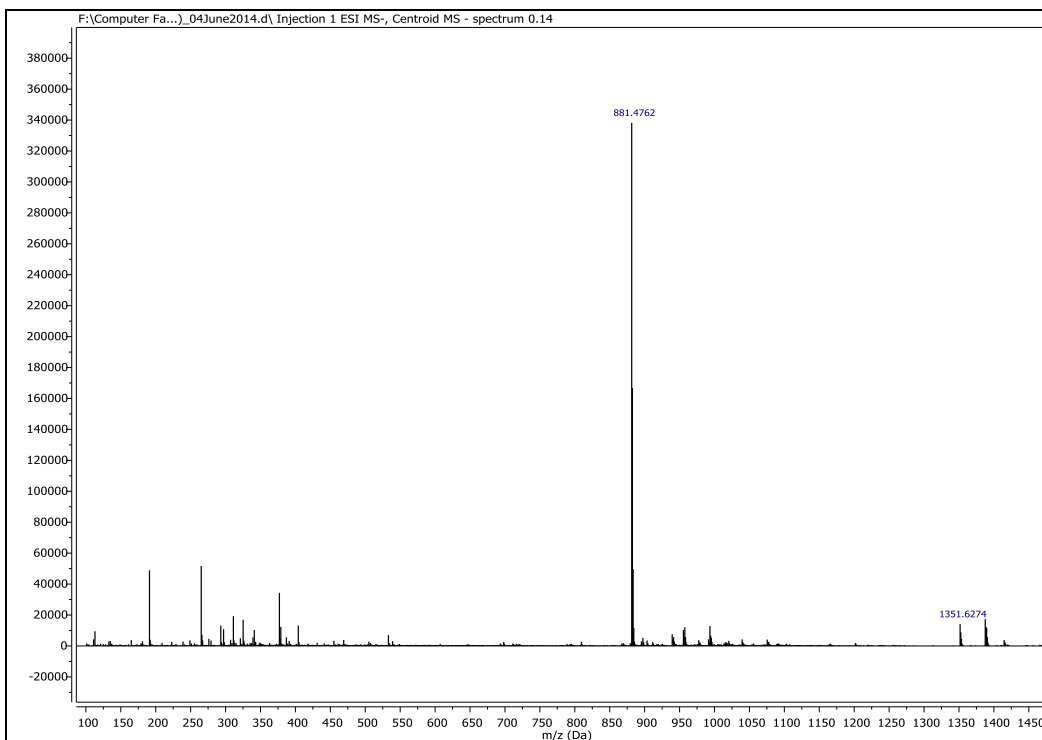

Figure 2: Negative HR-ESIMS spectrum for compound **1**.

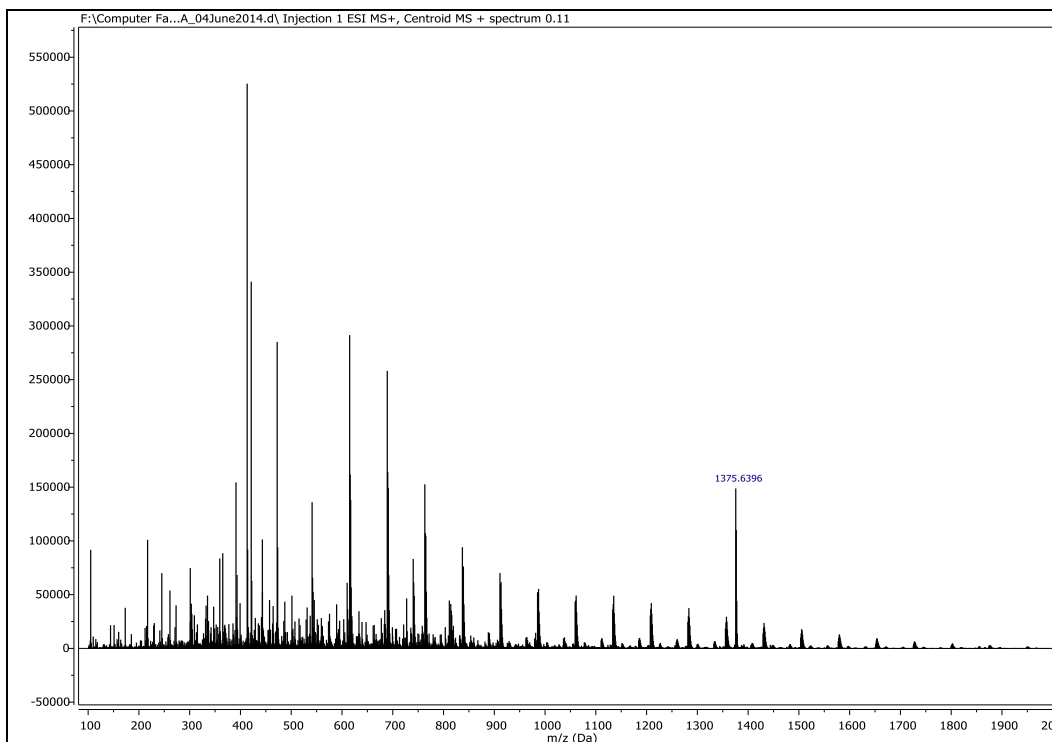

Figure 3: Positive HR-ESIMS spectrum for compound **1**.

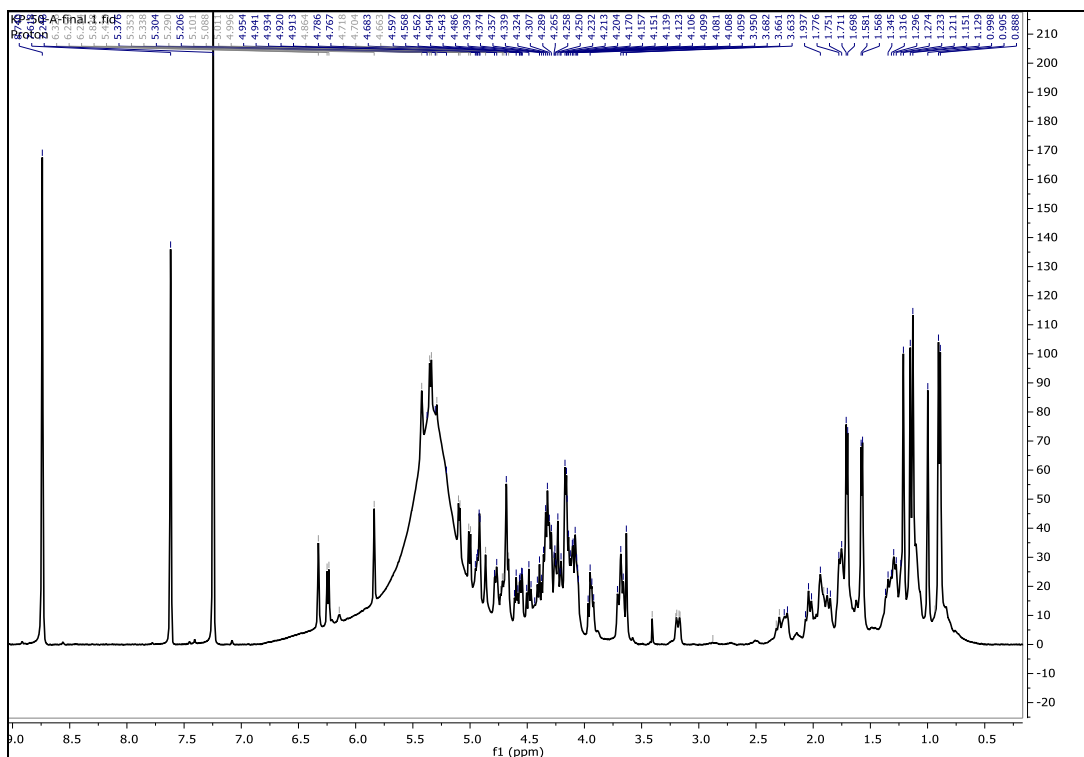

Figure 4:  $^1\text{H-NMR}$  spectrum (400 MHz,  $\delta$  in ppm) for compound **1** in  $\text{Pyridine-}d_6$

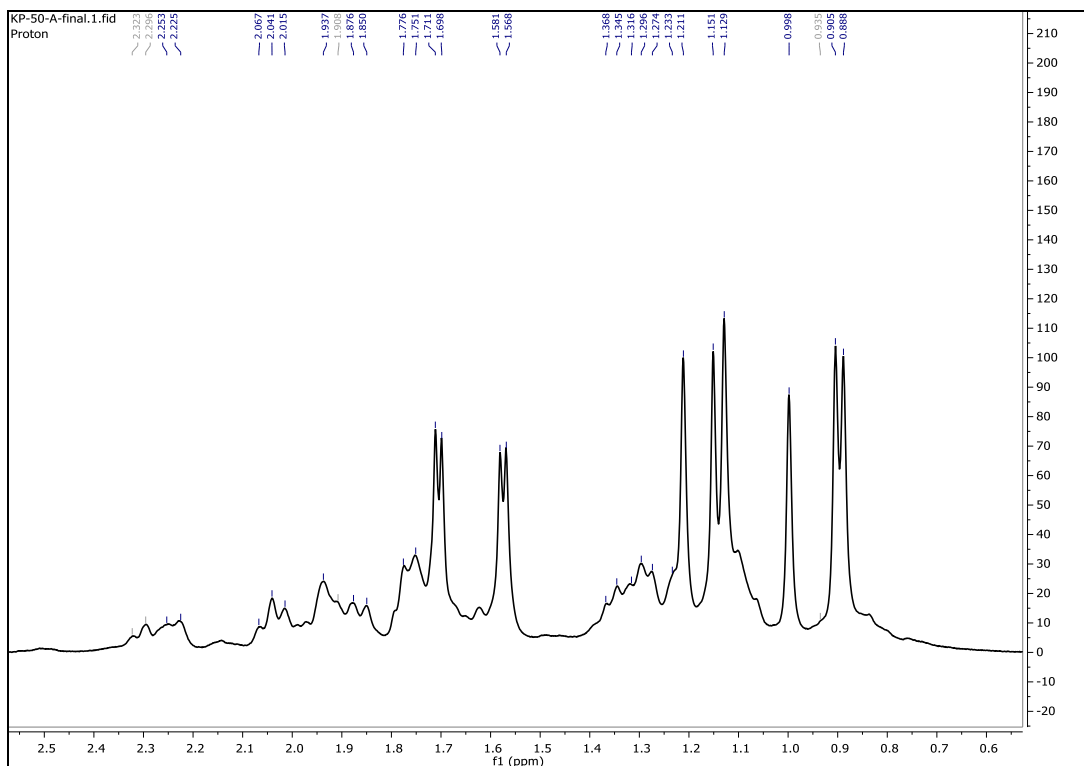

Figure 5: Expanded  $^1\text{H-NMR}$  spectrum (400 MHz,  $\delta$  in ppm) for compound **1** in  $\text{Pyridine-}d_6$

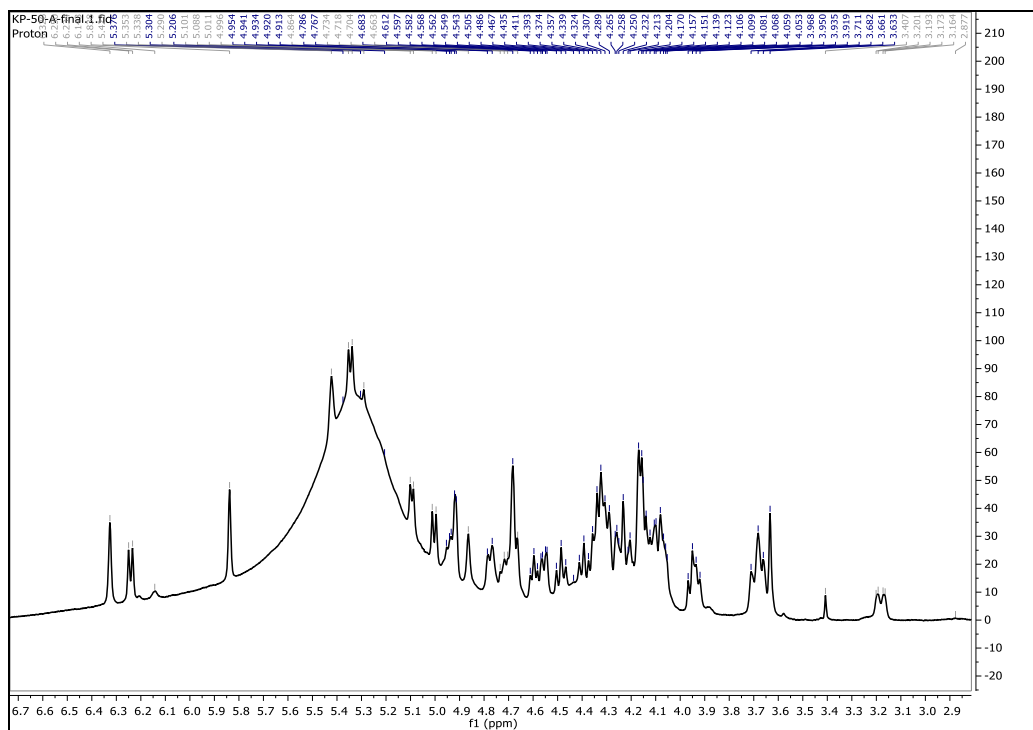

Figure 6: Expanded  $^1\text{H}$ -NMR spectrum (400 MHz,  $\delta$  in ppm) for compound **1** in Pyridine- $d_6$

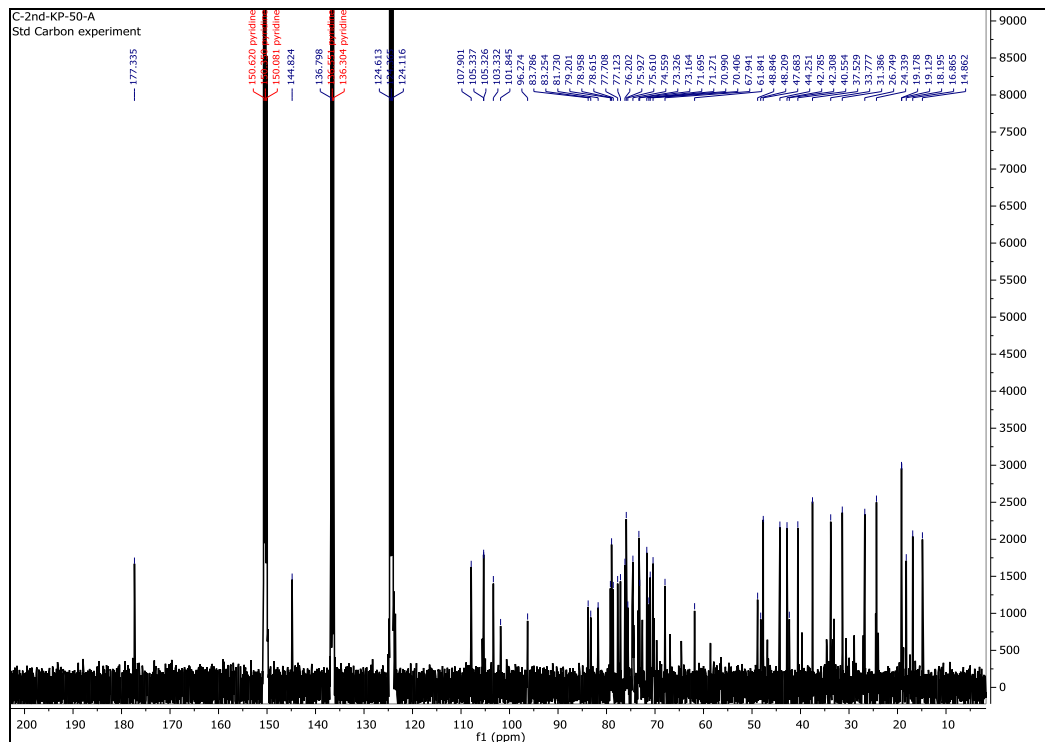

Figure 7:  $^{13}\text{C}$ -NMR spectrum (100 MHz,  $\delta$  in ppm) for compound **1** in Pyridine- $d_6$

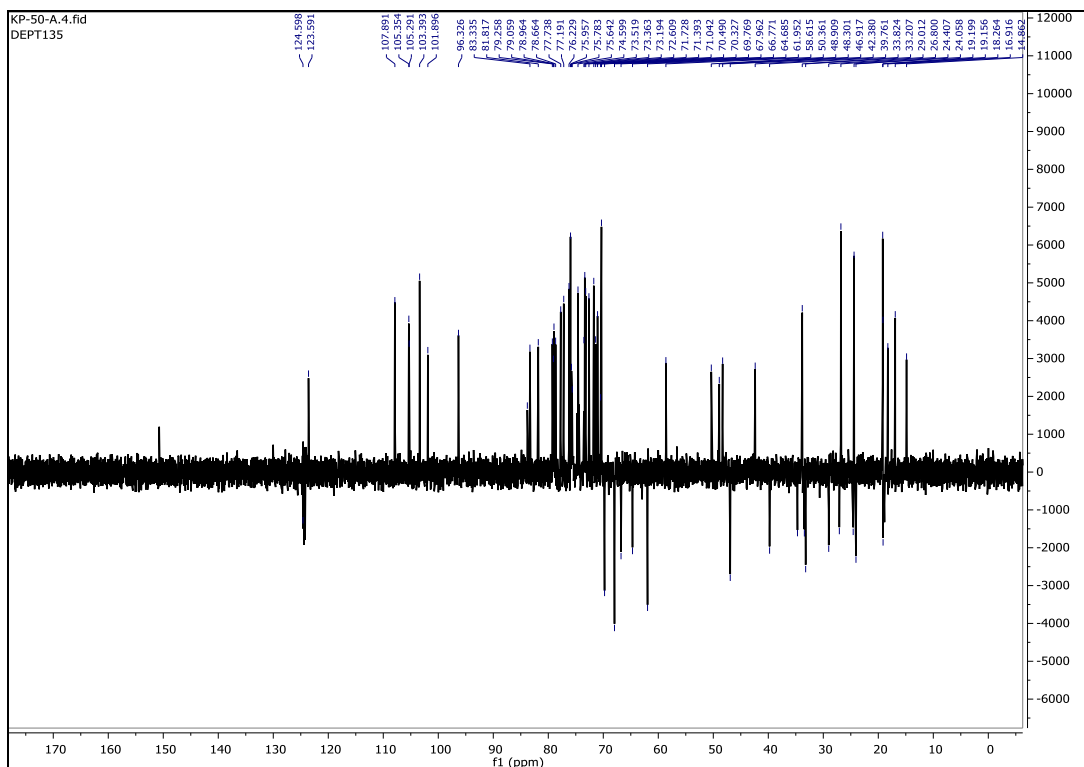

Figure 8: DEPT spectrum (400 MHz,  $\delta$  in ppm) for compound **1** in Pyridine- $d_6$

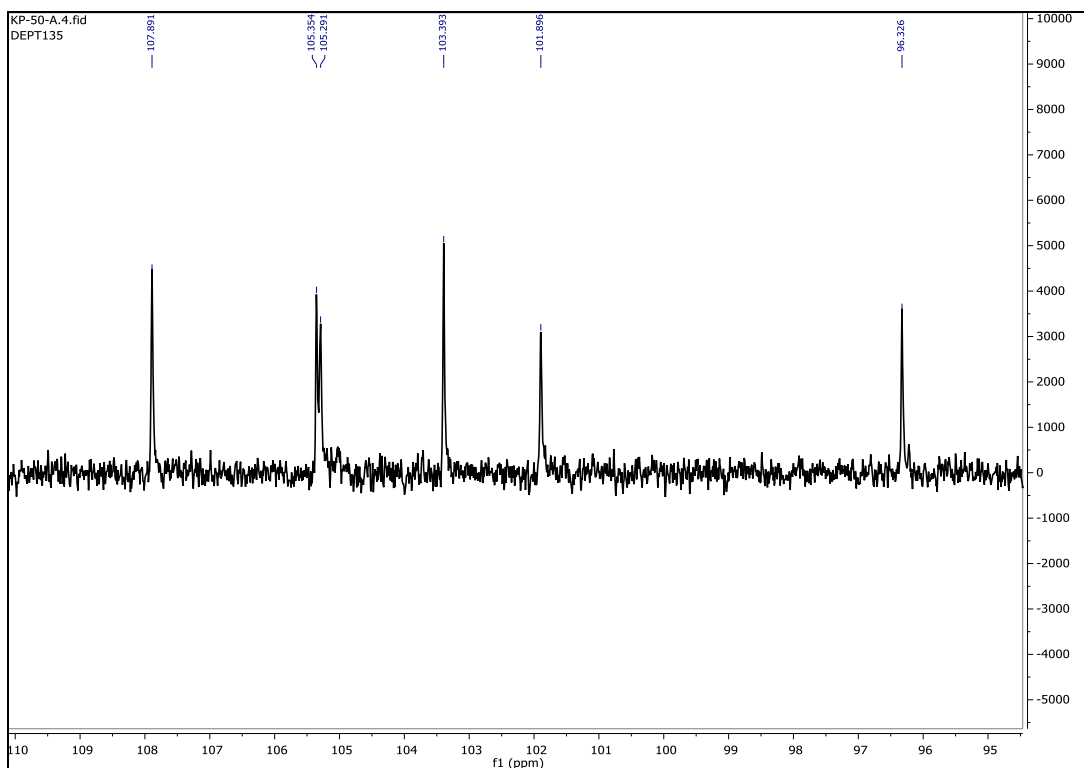

Figure 9: Expanded DEPT spectrum (400 MHz,  $\delta$  in ppm) for compound **1** in Pyridine- $d_6$

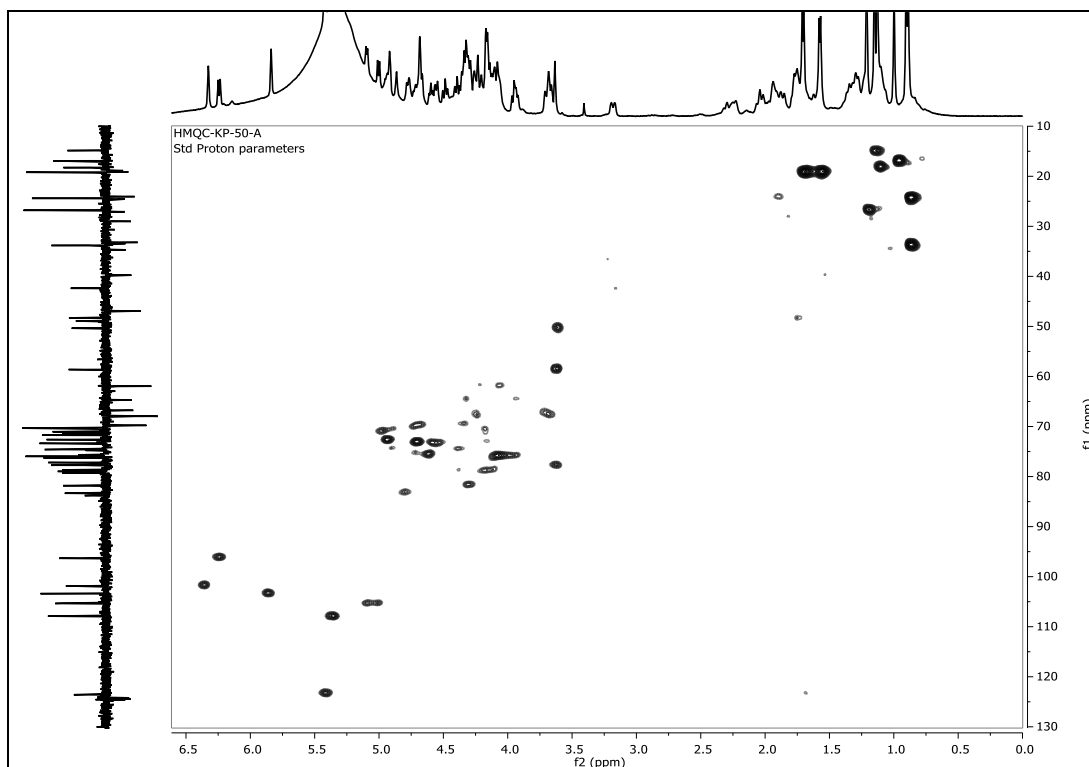

Figure 10: HMQC spectrum (400 MHz,  $\delta$  in ppm) for compound **1** in Pyridine- $d_6$

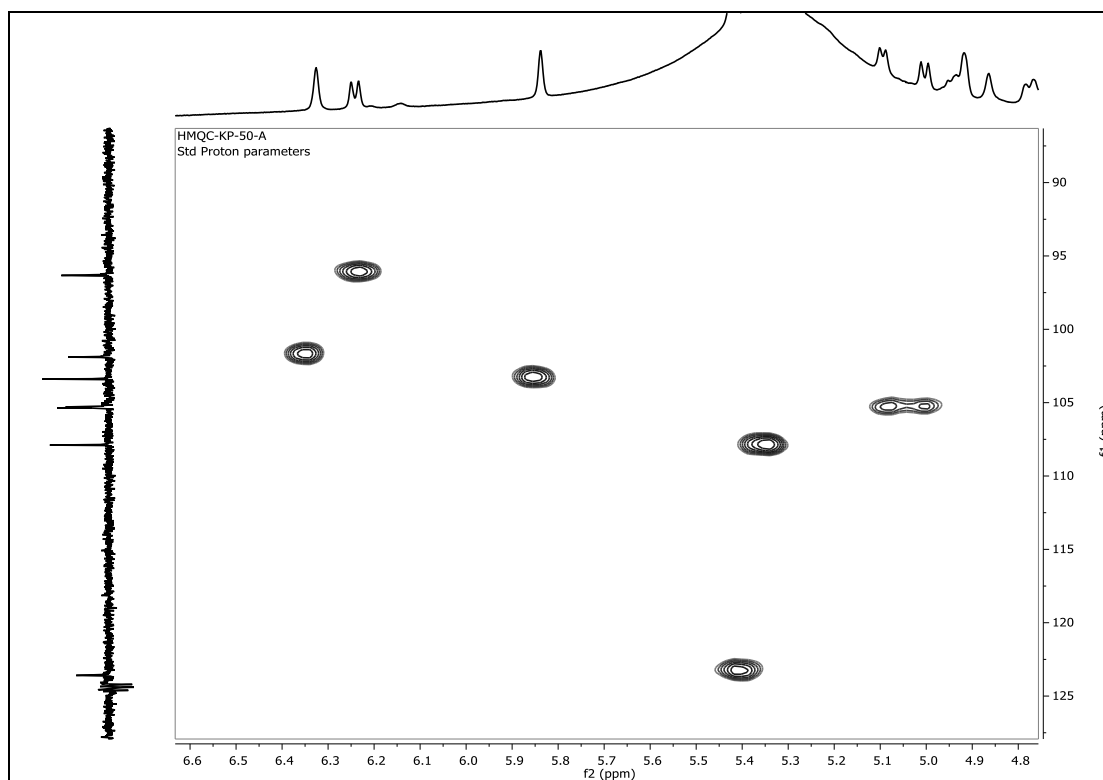

Figure 11: Expanded HMQC spectrum (400 MHz,  $\delta$  in ppm) for compound **1** in Pyridine- $d_6$

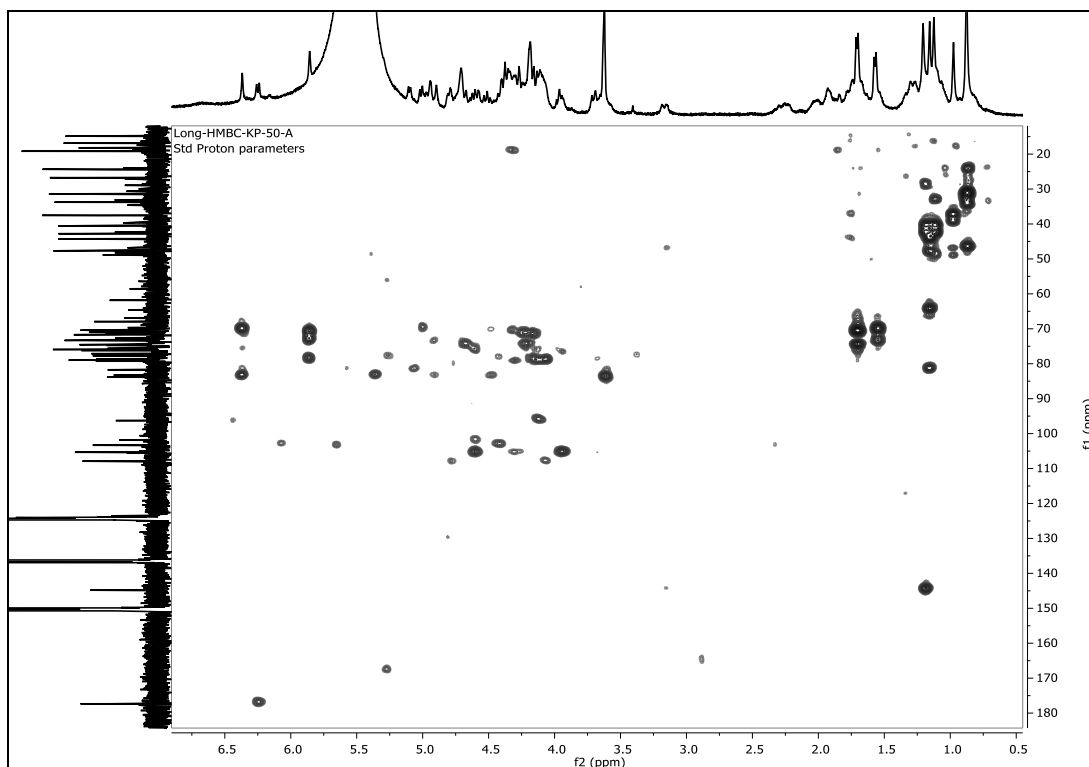

Figure 12: HMBC spectrum (400 MHz,  $\delta$  in ppm) for compound **1** in Pyridine- $d_6$

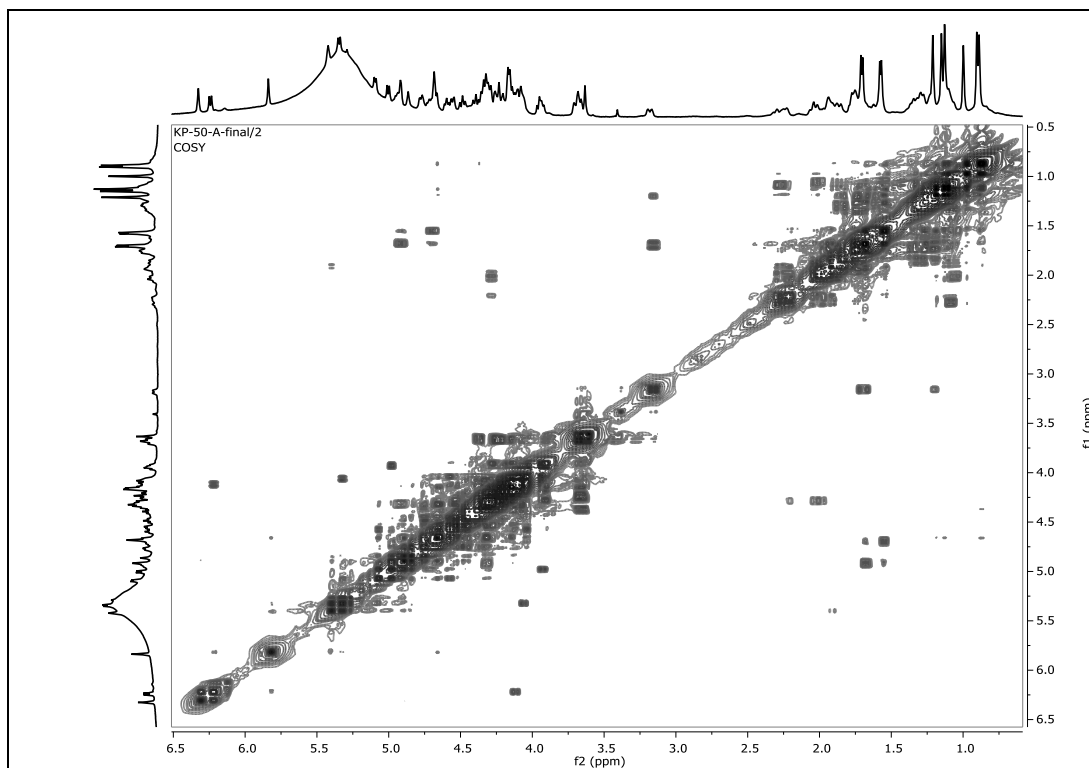

Figure 13: COSY spectrum (400 MHz,  $\delta$  in ppm) for compound **1** in Pyridine- $d_6$



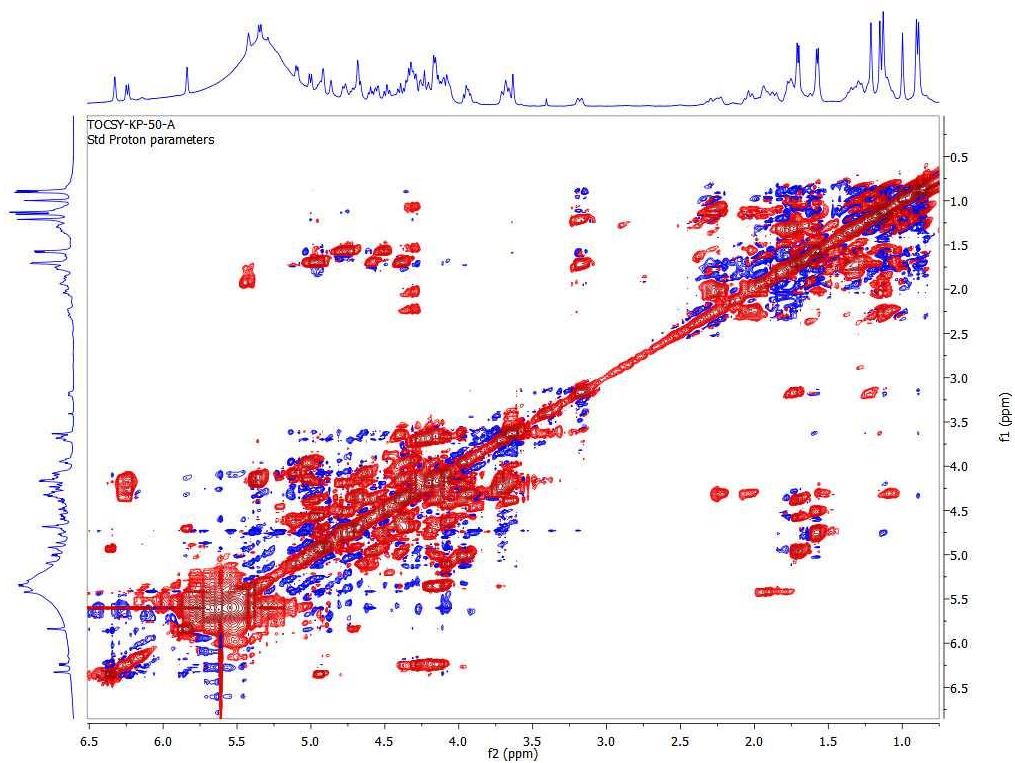

Figure 14: TOCSY spectrum (400 MHz,  $\delta$  in ppm) for compound **1** in Pyridine- $d_6$

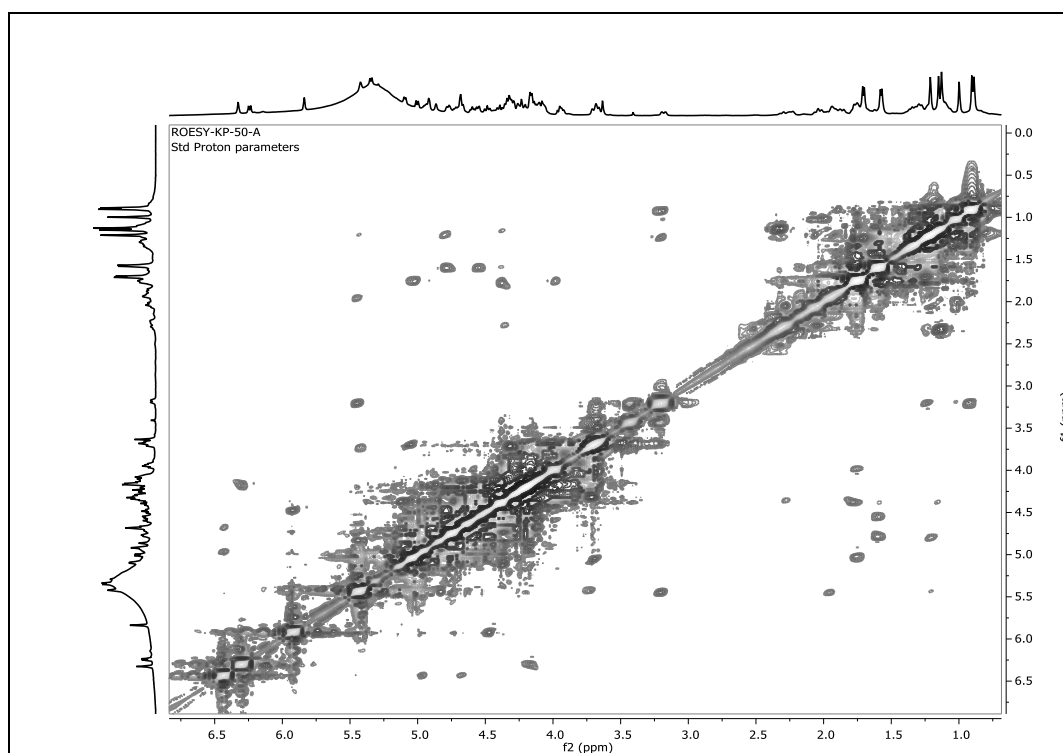

Figure 15: ROESY spectrum (400 MHz,  $\delta$  in ppm) for compound **1** in Pyridine- $d_6$

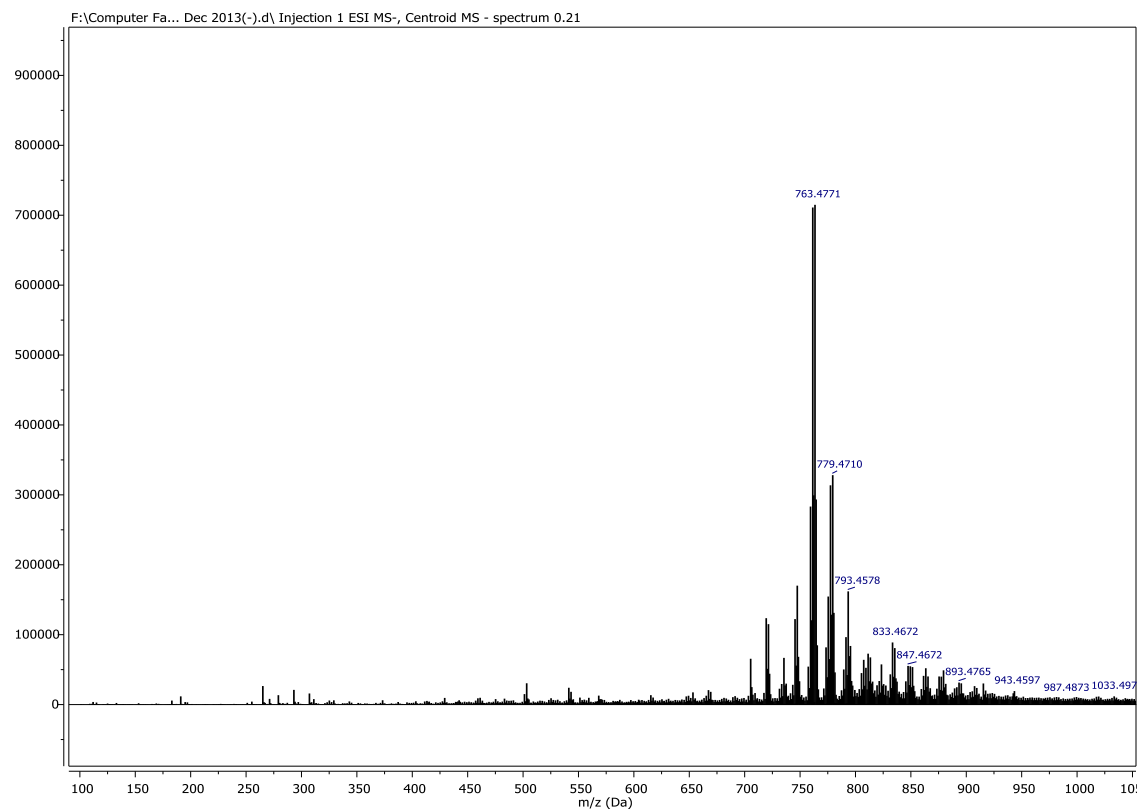

Figure 16: Negative HR-ESIMS spectrum for compound **2**.

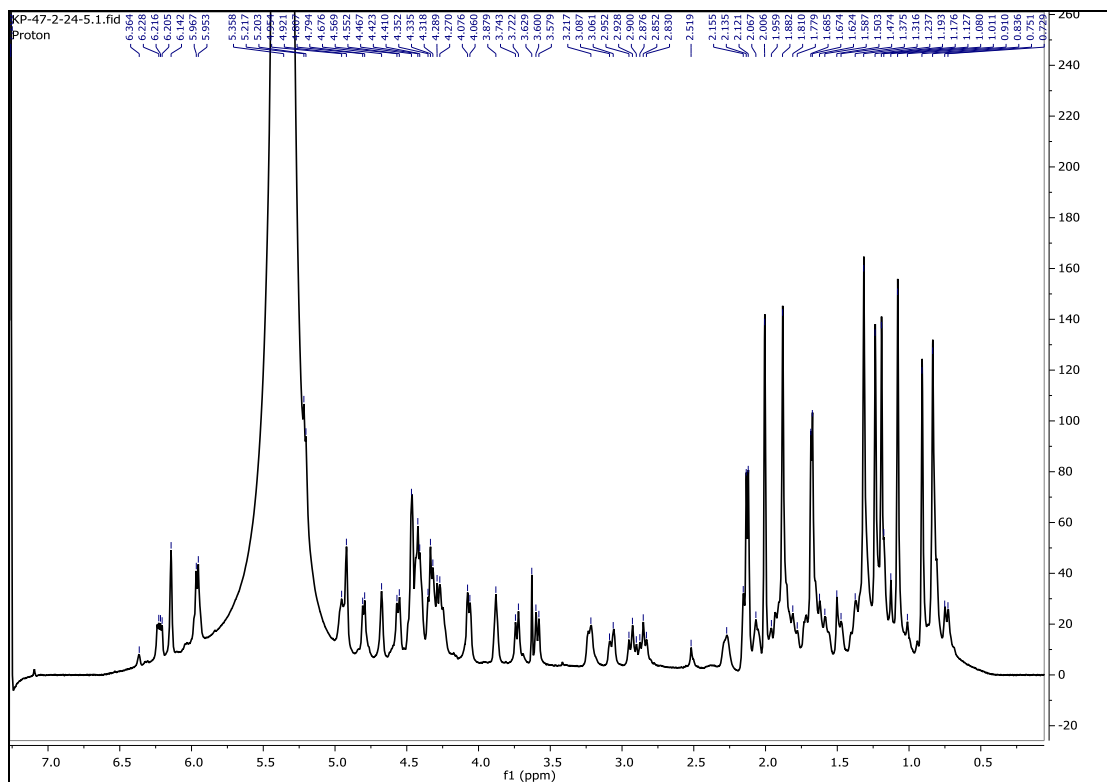

Figure 17:  $^1\text{H-NMR}$  spectrum (400 MHz,  $\delta$  in ppm) for compound **2** in Pyridine- $d_6$

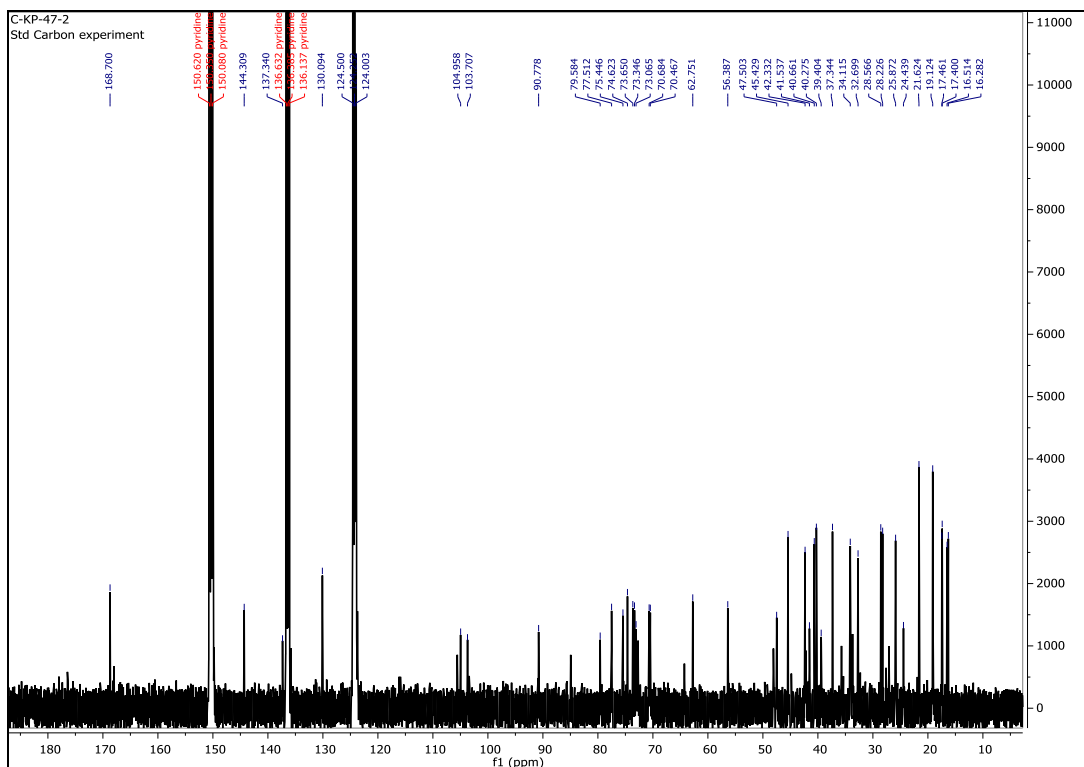

Figure 18:  $^{13}\text{C}$ -NMR spectrum (400 MHz,  $\delta$  in ppm) for compound **2** in Pyridine- $d_6$

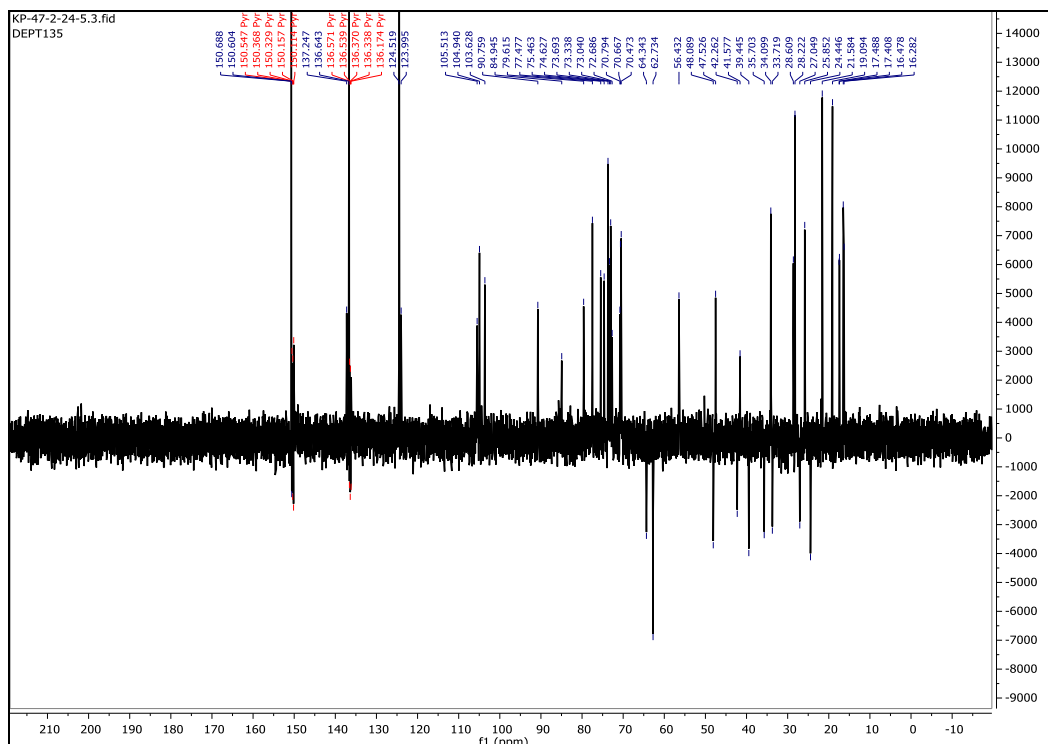

Figure 19: DEPT spectrum (400 MHz,  $\delta$  in ppm) for compound **2** in Pyridine- $d_6$

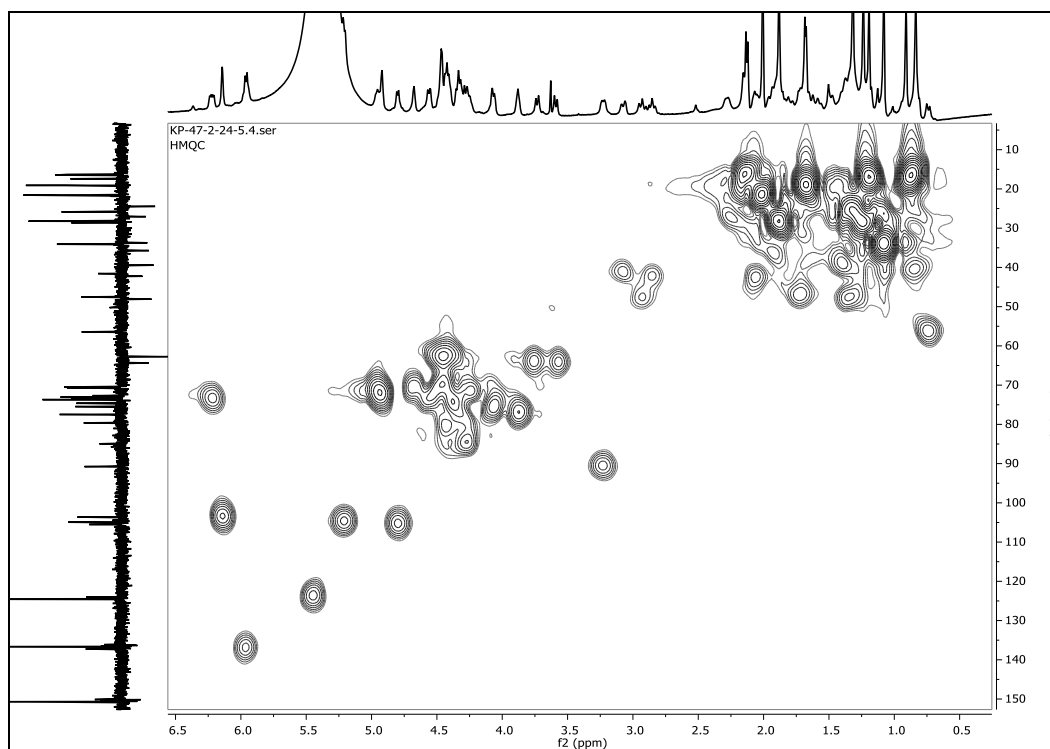

Figure 20: HMQC spectrum (400 MHz,  $\delta$  in ppm) for compound **2** in Pyridine- $d_6$

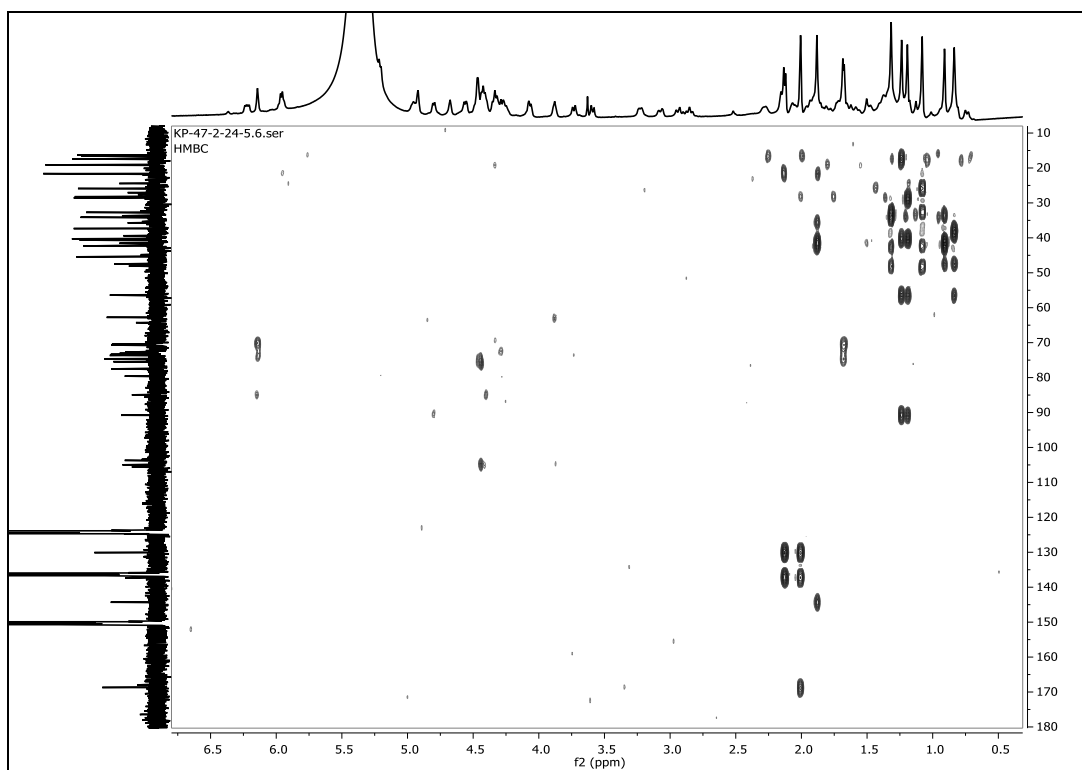

Figure 21: HMBC spectrum (400 MHz,  $\delta$  in ppm) for compound **2** in Pyridine- $d_6$

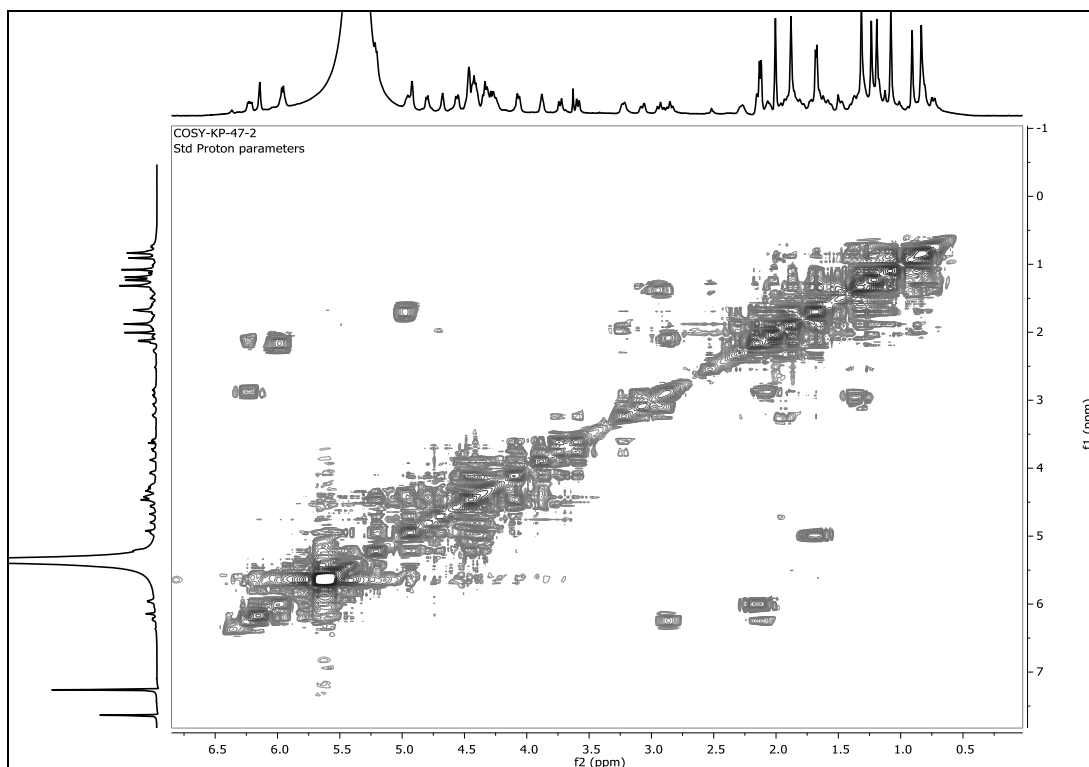

Figure 22: COSY spectrum (400 MHz,  $\delta$  in ppm) for compound **2** in Pyridine-*d*<sub>6</sub>

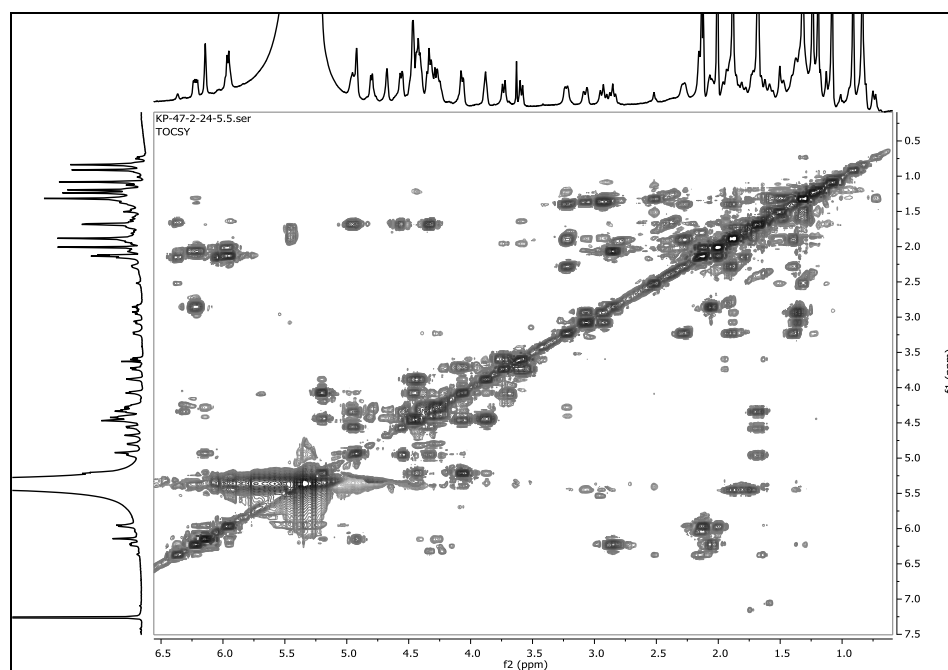

Figure 23: TOCSY spectrum (400 MHz,  $\delta$  in ppm) for compound **2** in Pyridine-*d*<sub>6</sub>

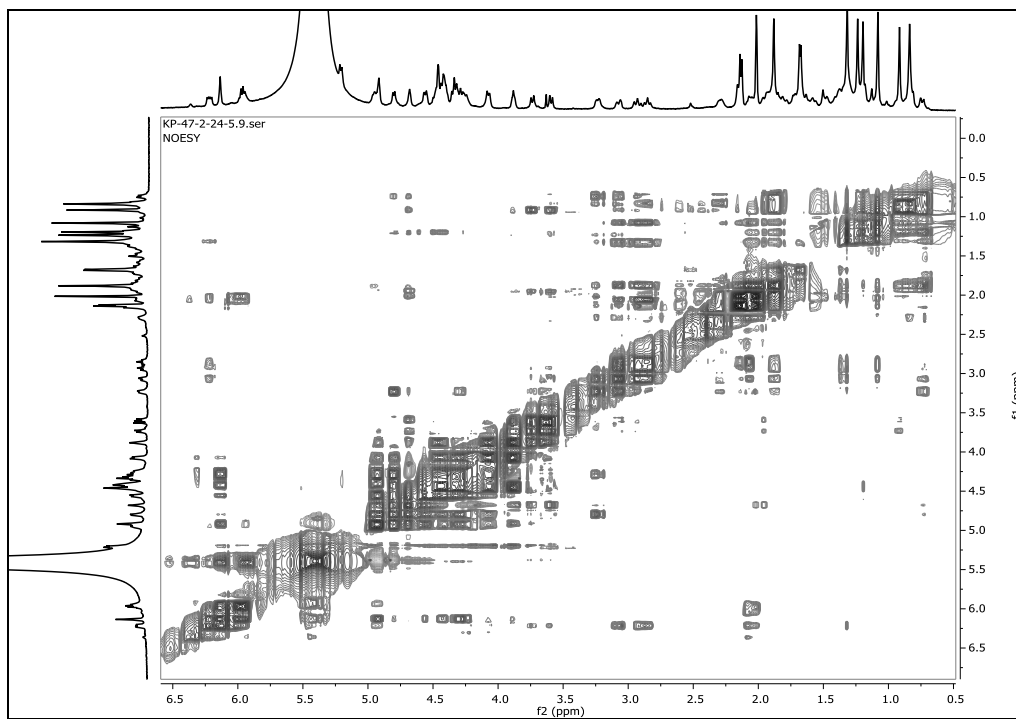

Figure 24: NOESY spectrum (400 MHz,  $\delta$  in ppm) for compound **2** in Pyridine- $d_6$

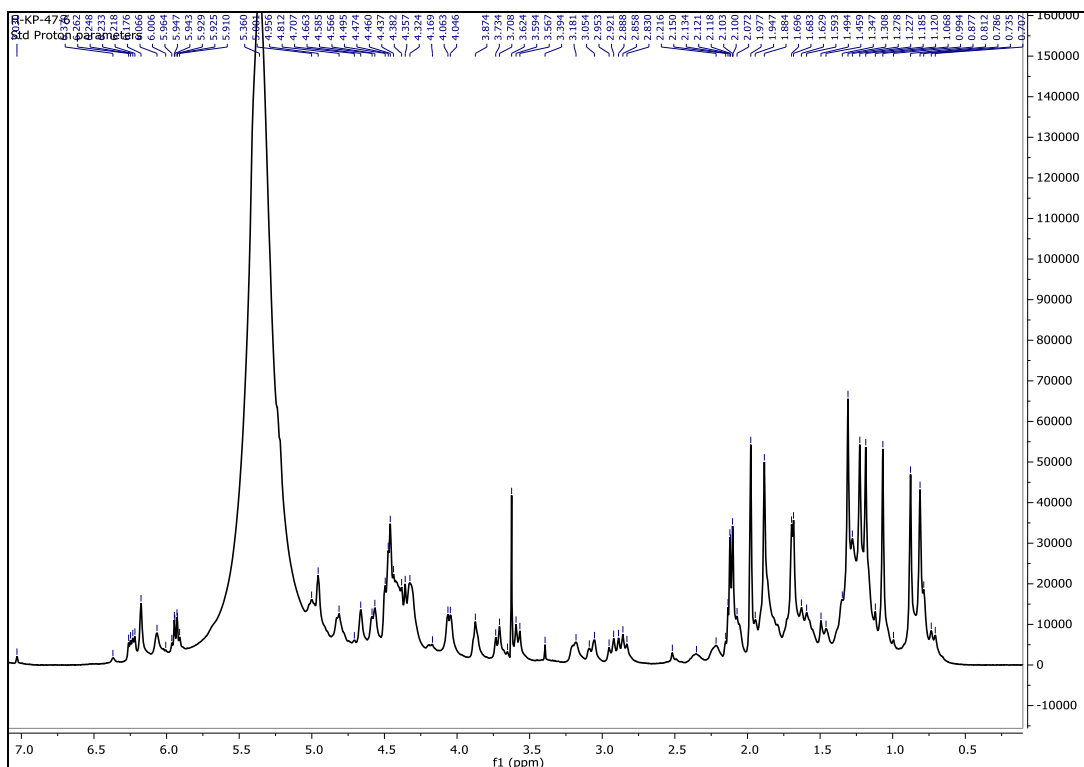

Figure 25:  $^1\text{H}$ -NMR spectrum (400 MHz,  $\delta$  in ppm) for compound **3** in Pyridine- $d_6$

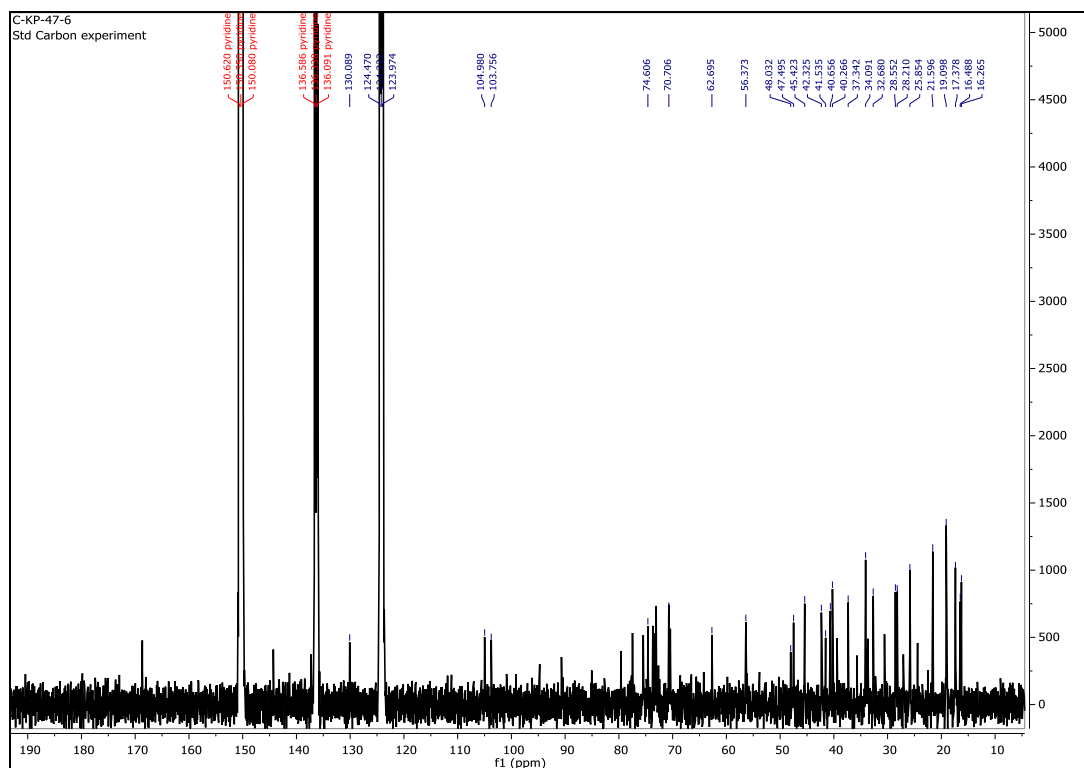

Figure 26:  $^{13}\text{C}$ -NMR spectrum (400 MHz,  $\delta$  in ppm) for compound **3** in Pyridine- $d_6$

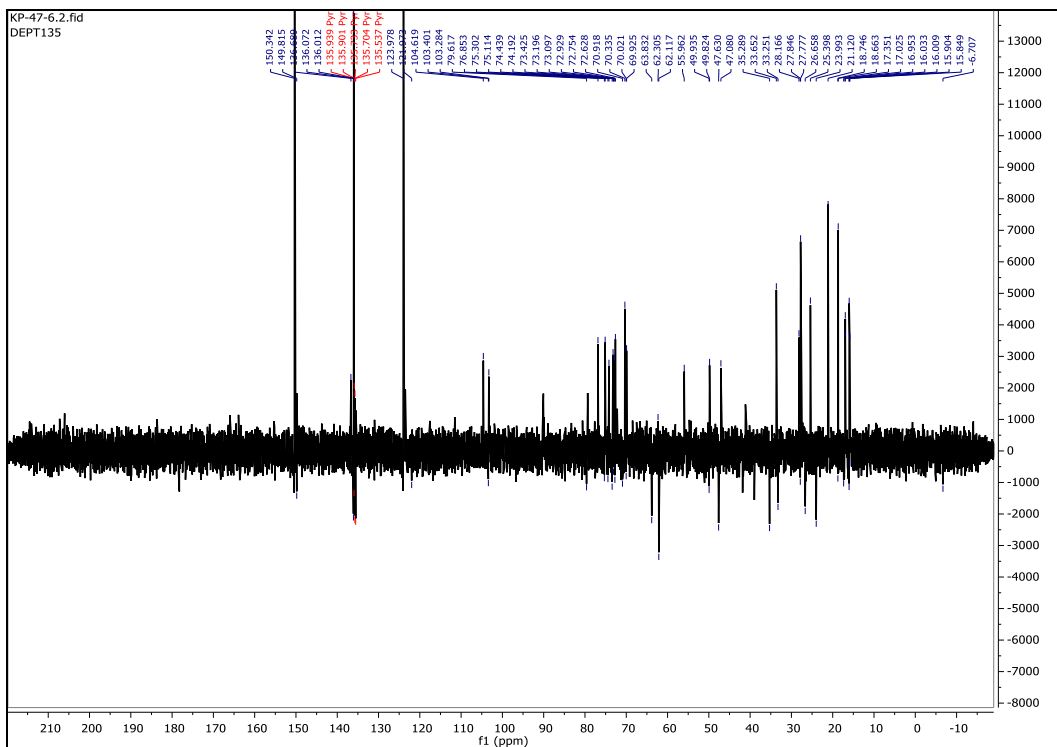

Figure 27: DEPT spectrum (400 MHz,  $\delta$  in ppm) for compound **3** in Pyridine- $d_6$

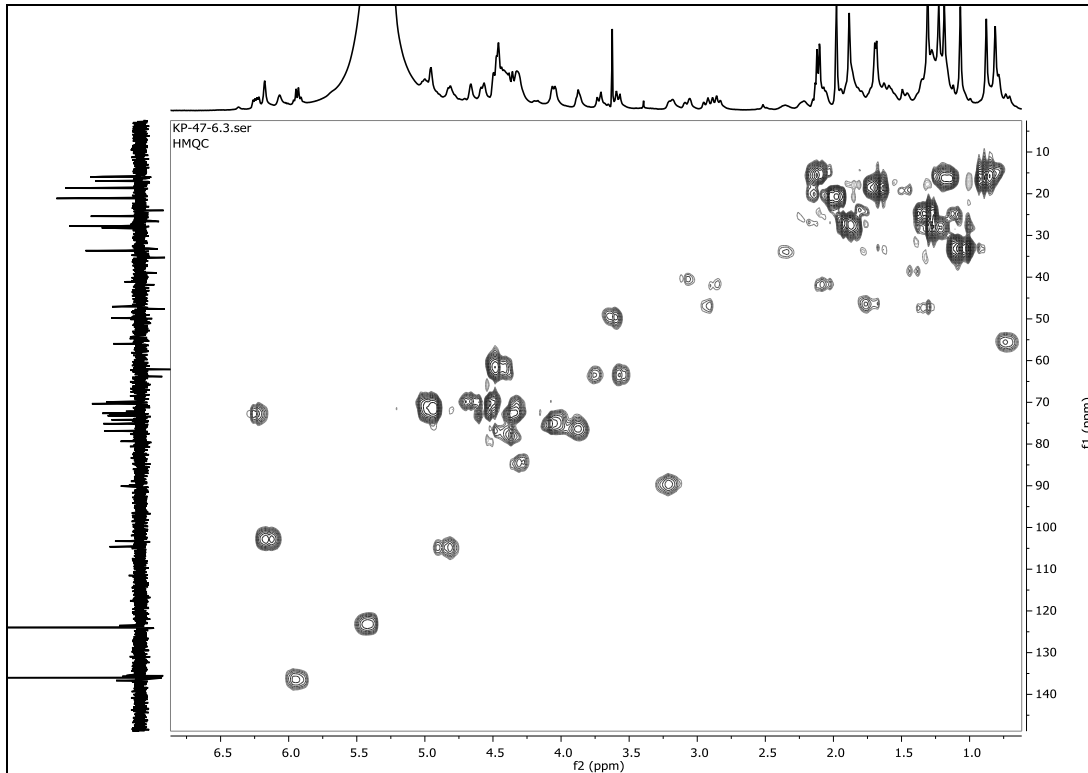

Figure 28: HMQC spectrum (400 MHz,  $\delta$  in ppm) for compound **3** in Pyridine- $d_6$



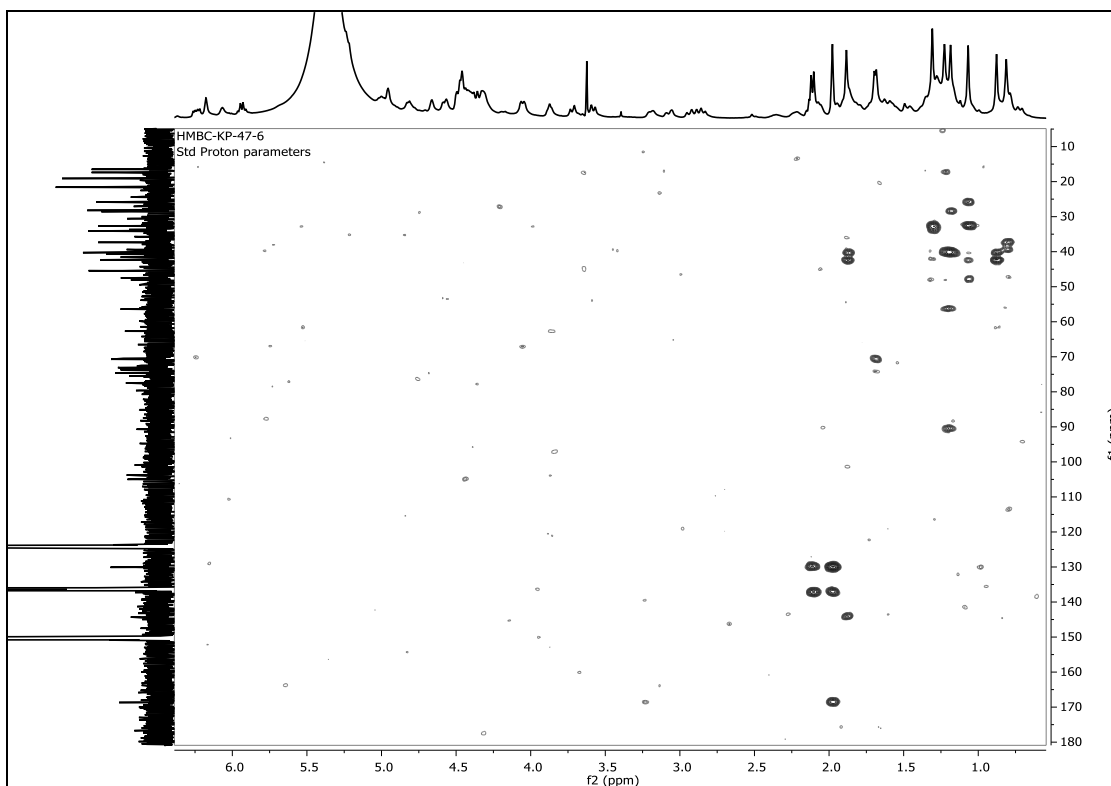

Figure 29: HMBC spectrum (400 MHz,  $\delta$  in ppm) for compound **3** in Pyridine- $d_6$
